# Supplementary material
Source: publisher figshare collection journal article supplement (https://frontiersin.figshare.com/ndownloader/files/17378051)
Supplement: Supplementary file [file 17378051]

## Supplementary materials

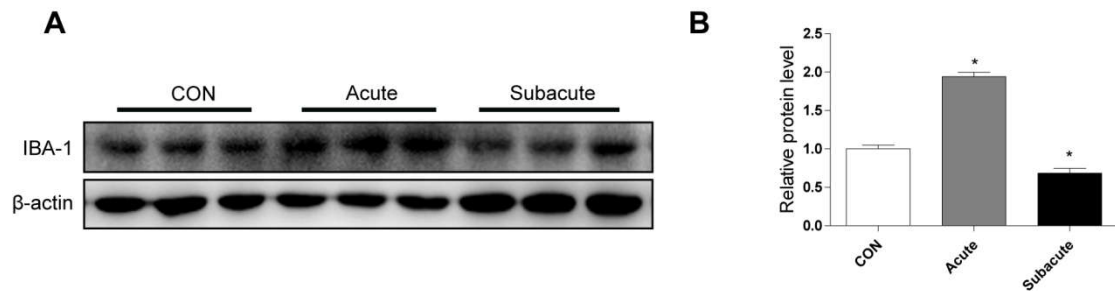

**Supplement FIG1 MA exposure induces IBA-1 expression *in vivo*.** Representative Western blots (A) and quantitative analyses (B) of IBA-1 in the corpus striatum tissues of mice from the control group, acute group and subacute group. N=5-8 animals/group. Fold induction relative to the vehicle-treated group (\* $p < 0.05$  vs. the vehicle-treated group using one-way ANOVA).  $\beta$ -actin was used as a loading control. All data are presented as the mean  $\pm$  SD.

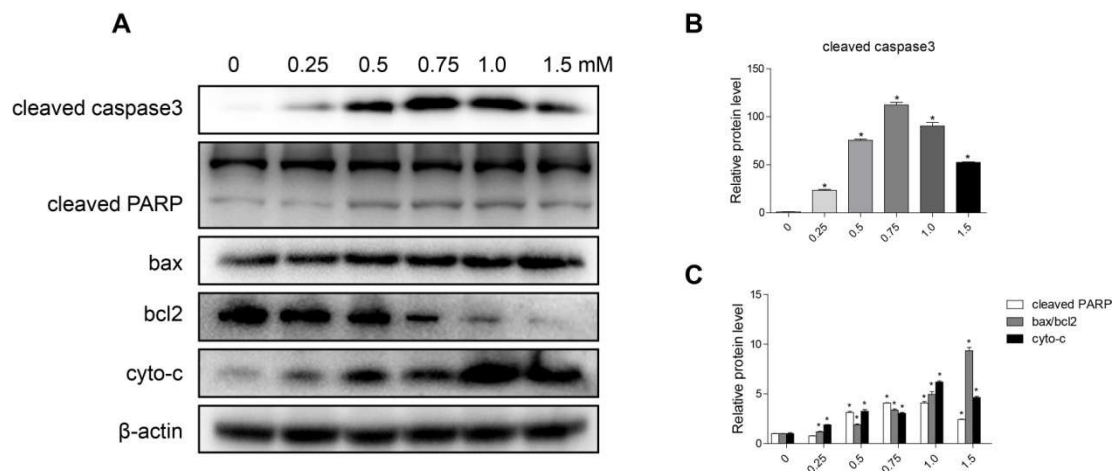

**Supplement FIG 2 MA increases apoptosis in a dose dependent manner.** Microglial line BV 2 cells were treated with 0.25–1.5 mM MA for 24 h (A-C). The protein expression levels of the cleaved caspase3 and cleaved PARP, ratio of bax/bcl2 and cytochrome c were determined with Western blot and quantitative analyses.  $\beta$ -actin was used as a loading control. The fold induction relative to that in vehicle-treated cells is shown. Data are presented as the means  $\pm$  SD. \* $P < 0.05$  vs. the saline vehicle-treated control group. Data were analyzed by one-way ANOVA.
